# Supplementary material for: Reconversion of Parahydrogen Gas in Surfactant-Coated Glass NMR Tubes
Source: MDPI journal article supplement (doi:10.3390/molecules28052329), 2023-03-02
Supplement: s1 [file s1]

## *Supplemental Document*

### **Reconversion of Parahydrogen Gas in Surfactant-Coated Glass NMR Tubes**

Robert V. Chimenti<sup>1,2</sup>, James Daley<sup>1,†</sup>, James Sack<sup>1,†</sup>, Jennifer Necsutu<sup>3,†</sup>, and  
Nicholas Whiting<sup>1,4,\*</sup>

<sup>1</sup>Department of Physics & Astronomy, Rowan University, Glassboro, NJ 08028, USA

<sup>2</sup>Advanced Materials & Manufacturing Institute, Rowan University, Glassboro, NJ 08028,  
USA

<sup>3</sup>Department of Chemistry & Biochemistry, Rowan University, Glassboro, NJ 08028, USA

<sup>4</sup>Department of Biological & Biomedical Sciences, Rowan University, Glassboro, NJ 08028,  
USA

\*Corresponding author:

Prof. Nicholas Whiting

Rowan University

101I Science Hall

201 Mullica Hill Dr.

Glassboro, NJ 08028

856-256-5436

[whitingn@rowan.edu](mailto:whitingn@rowan.edu)

<sup>†</sup>Undergraduate researcher

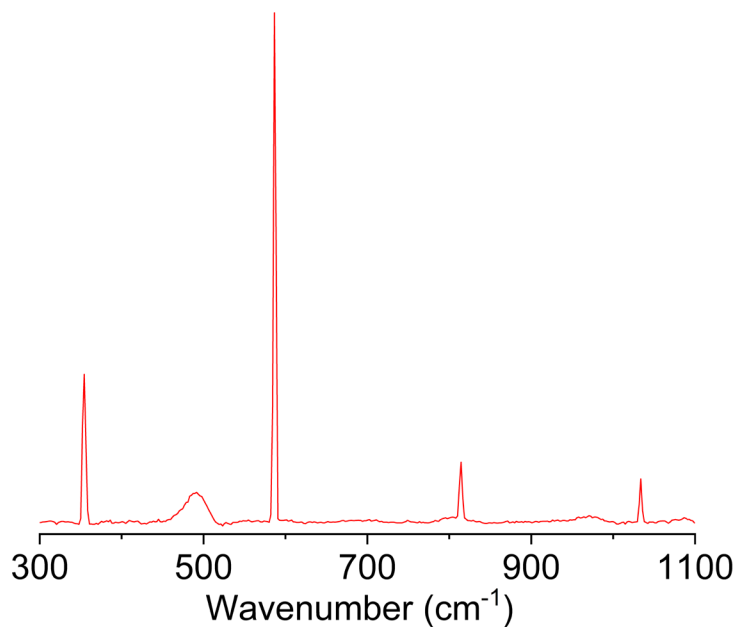

**Supplemental Figure S1:** Example extended Raman spectra of nH<sub>2</sub> gas showing the first four rotational transitions: lower-energy J: 0 → 2 (para; 355 cm<sup>-1</sup>) and J: 1 → 3 (ortho; 586 cm<sup>-1</sup>) peaks, as well as higher-energy peaks at the J: 2 → 4 (para; 812 cm<sup>-1</sup>) and J: 3 → 5 (ortho; 1032 cm<sup>-1</sup>) transitions. Spectra collected using NMR tube coated with OTS surfactant at the time point of  $t = 3,988$  min after filling with pD<sub>2</sub>-enriched gas.

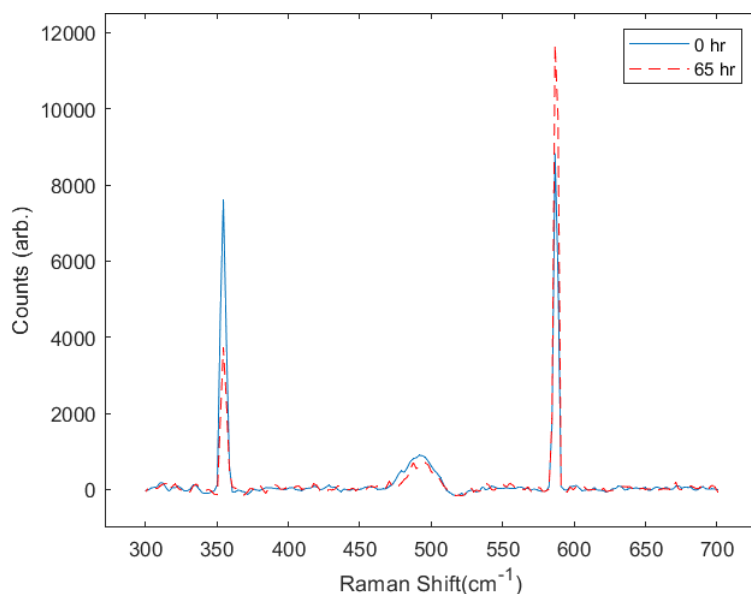

**Supplemental Figure S2:** Example Raman spectra of the  $J: 0 \rightarrow 2$  ‘para’ spin peak ( $355 \text{ cm}^{-1}$ ) and  $J: 1 \rightarrow 3$  ‘ortho’ spin peak ( $586 \text{ cm}^{-1}$ ), taken both immediately after loading the  $\text{pH}_2$ -enriched gas into the valved NMR tube (blue solid line) and after 65 hours had elapsed (red dashed line). This figure plots the same spectra that is available in Figure 4, and demonstrates consistent Raman shifts and linewidths for the peaks.

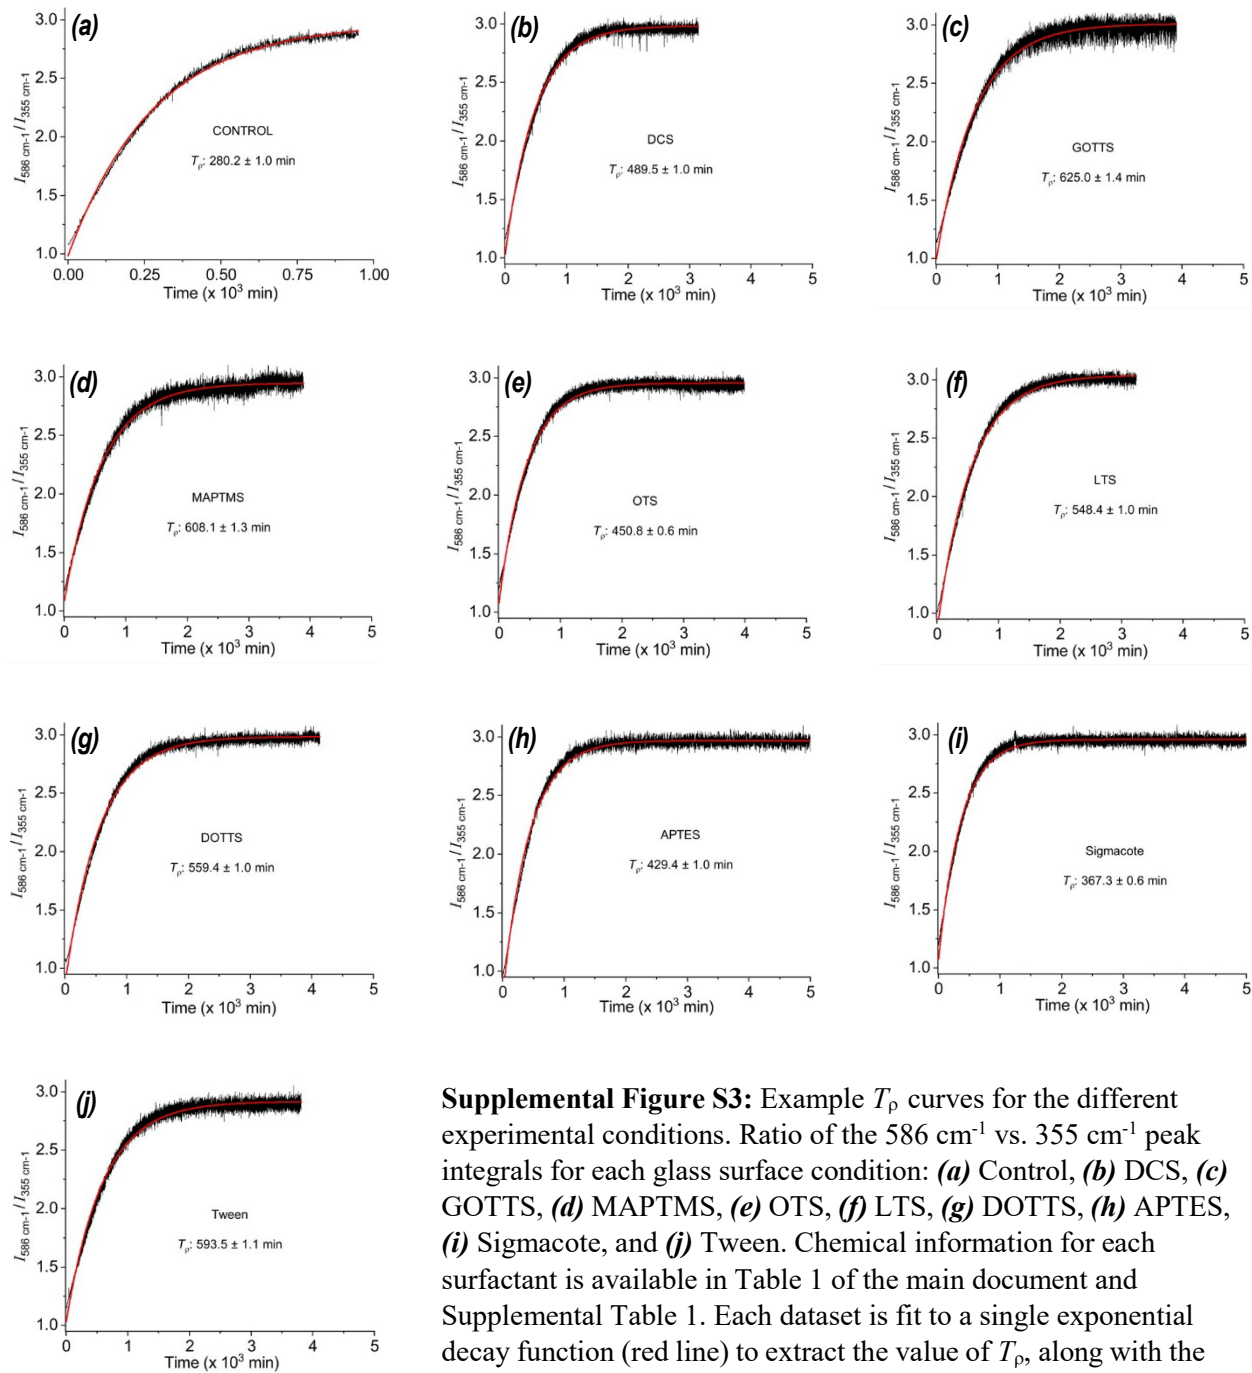

**Supplemental Figure S3:** Example  $T_p$  curves for the different experimental conditions. Ratio of the  $586 \text{ cm}^{-1}$  vs.  $355 \text{ cm}^{-1}$  peak integrals for each glass surface condition: **(a)** Control, **(b)** DCS, **(c)** GOTTs, **(d)** MAPTMS, **(e)** OTS, **(f)** LTS, **(g)** DOTTS, **(h)** APTES, **(i)** Sigmacote, and **(j)** Tween. Chemical information for each surfactant is available in Table 1 of the main document and Supplemental Table 1. Each dataset is fit to a single exponential decay function (red line) to extract the value of  $T_p$ , along with the listed fit error. Please note the different x-axis scale for part **(a)**.

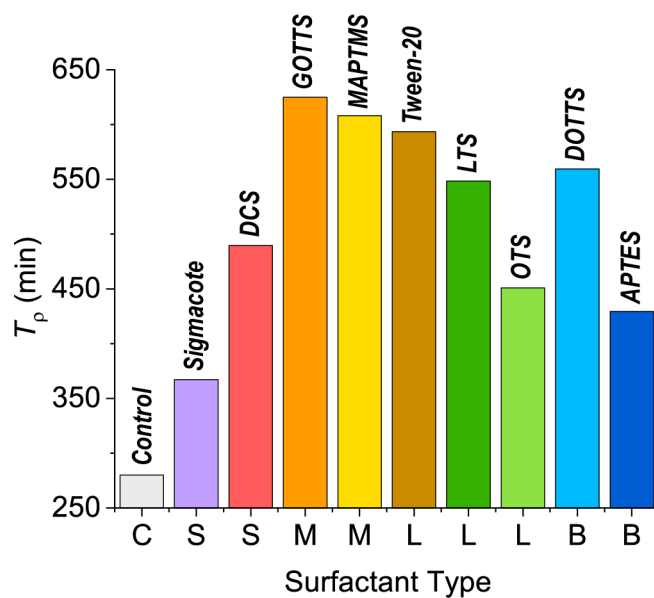

**Supplemental Figure S4:** pH<sub>2</sub> reconversion rate ( $T_p$ ) data from Figure 6 plotted with the surfactant types grouped. The x-axis denotes the surfactant type: control (C), short (S), medium (M), long (L), and branched (B).

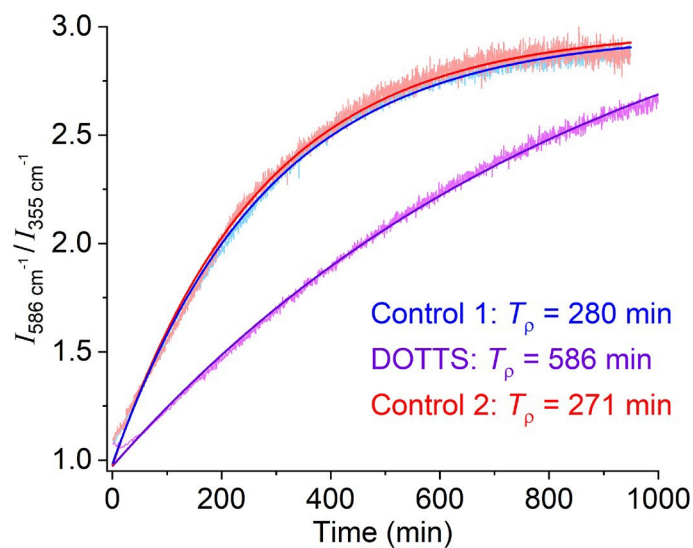

**Supplemental Figure S5:** Comparison of the  $I_{586 \text{ cm}^{-1}} / I_{355 \text{ cm}^{-1}}$  time course measurements under three conditions: an NMR tube with no surfactant (Control 1;  $T_p$ : 280 min; blue) followed by the same NMR tube coated with DOTS surfactant (DOTS;  $T_p$ : 586 min; purple). The tube was then stripped of surfactant (following the protocol in Section 2.2 of the manuscript), and another time course measurement was completed (Control 2;  $T_p$ : 271 min; red). This demonstrates that adequate surfactant removal between experiments was achieved.

| Acronym   | Chemical Name                             | $T_p$ (min)     | Vendor            | Product #    |
|-----------|-------------------------------------------|-----------------|-------------------|--------------|
| Bare      | -----                                     | $280.2 \pm 1.0$ | -----             | -----        |
| DCS       | Dichloromethylsilane                      | $489.5 \pm 1.0$ | Sigma Aldrich     | 440248-100ML |
| GOTTS     | (3-Glycidoxypropyl)trimethoxysilane       | $625.0 \pm 1.4$ | Beantown Chemical | 145300-25G   |
| MAPTMS    | 3-(Methacryloyloxy)propyltrimethoxysilane | $608.1 \pm 1.3$ | Alfa Aesar        | A17714       |
| OTS       | n-Octadecyltrichlorosilane                | $450.8 \pm 0.6$ | Alfa Aesar        | A15732       |
| LTS       | Lauryl triethoxysilane                    | $548.4 \pm 1.0$ | AFG Scientific    | 184284-1G    |
| DOTTS     | 1,7-Dichloro-octamethyltetrasiloxane      | $559.4 \pm 1.0$ | Sigma Aldrich     | 384372-25G   |
| APTES     | (3-Aminopropyl)-triethoxysilane           | $429.4 \pm 1.0$ | Beantown Chemical | 123580-100G  |
| Sigmacote | Sigmacote                                 | $367.3 \pm 0.6$ | Sigma Aldrich     | SL2-25ML     |
| Tween-80  | Polyoxyethylene sorbitan monolaurate      | $593.5 \pm 1.1$ | MP Biomedical     | 103170       |

**Supplemental Table 1:** Chemical and vendor information for surfactants used in this study, along with  $T_p$  tabulation (error indicative of equation fitting).
